# Supplementary material
Source: PubMed Central journal article supplement (PMC4187733)
Supplement: MCB.00157-14_zmb999100597so3.pdf [file MCB.00157-14_zmb999100597so3.pdf]

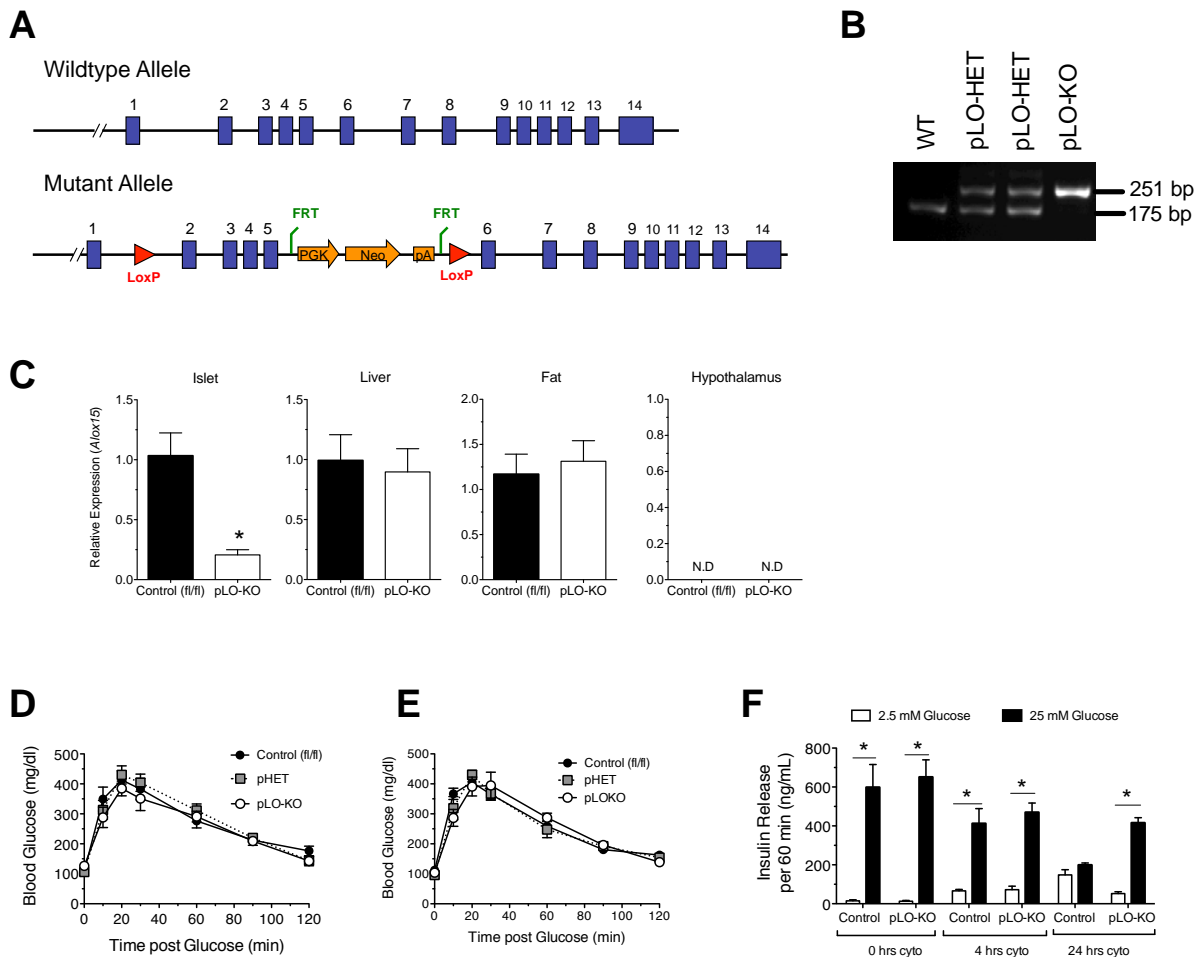

**Supplemental Figure 1: Generation and verification of pLO-KO mice.** *A*, schematic representations of the wild-type and mutant alleles corresponding to the mouse *Alox15* gene. Numbers and blue rectangles indicate positions of exons. *FRT*, Flp recombinase recognition sequences. *LoxP*, Cre recombinase recognition sequences; *B*, 2% agarose gel showing PCR amplification from genomic DNA of the mutant allele (251 base pair band) and wild-type allele (175 base pair band); *C*, RT-PCR results from RNA isolated from islets, fat, liver, and hypothalamus from control and pLO-KO mice (normalized to *Actb*). *D*, Results of intraperitoneal GTT performed at 12 weeks of age in male mice; *E*, results of intraperitoneal GTT performed at 12 weeks of age in female mice; *F*, insulin secretion at 2.5 mM glucose (2.5G) and 25 mM glucose (25G) from isolated islets from male mice after 0, 4, or 24 hours of cytokine treatment; Data in *panels C, D*, and *E* represent the average from 3 mice per genotype. In *panel F*, N=4 independent experiments.

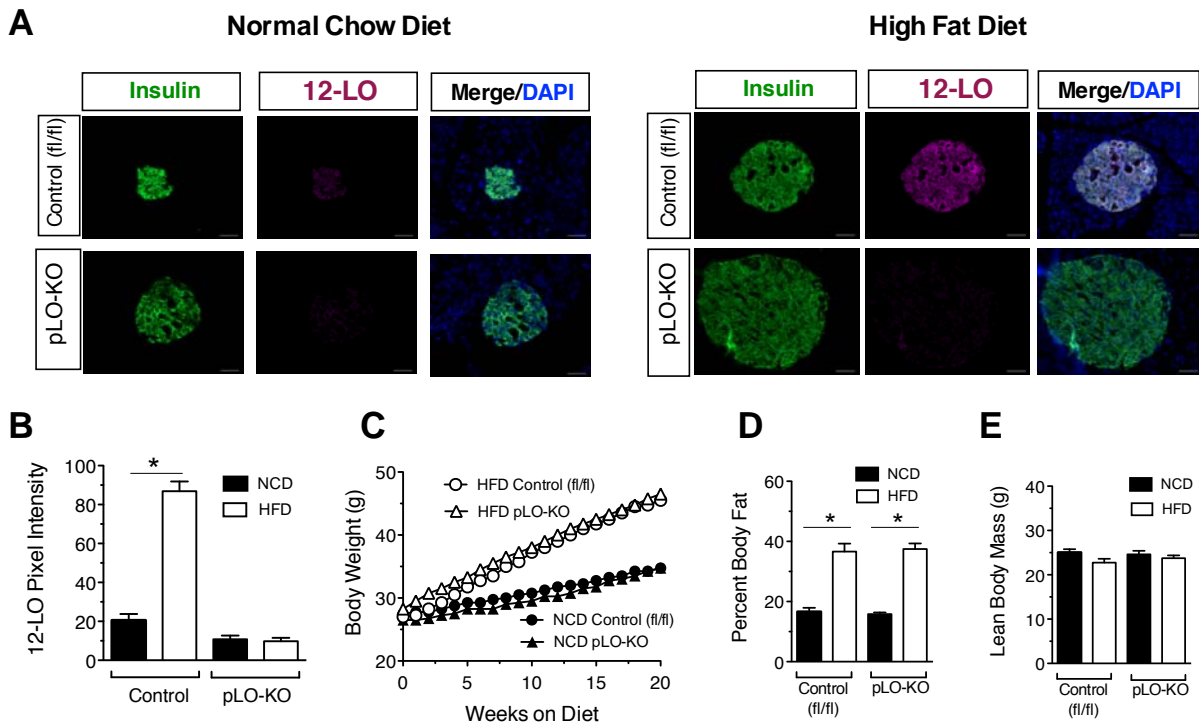

**Supplemental Figure 2: 12-LO staining, body fat distribution and adipocyte size after high fat diet feeding.** At 8 weeks of age Control (*fl/fl*) and pLO-KO male mice were placed on a normal chow diet (NCD) or a 42% kcal from fat high fat diet (HFD) for 20 weeks (N=8 animals per group). **A**, Pancreas sections from control and pLO-KO mice fed a NCD or HFD for 20 weeks were immunostained for 12-LO (*red*), insulin (*green*), and DAPI (*blue*). Magnification x200; **B**, Quantitation of 12-LO staining shown in *panel A*. **C**, Weekly body weight measurements in NCD-fed and HFD-fed mice; **D**, Percent body fat after 20 weeks feeding, as determined by dual x-ray absorptiometry; **E**, lean body mass after 20 weeks feeding, as determined by dual x-ray absorptiometry; \* $P < 0.05$  for the comparisons indicated.

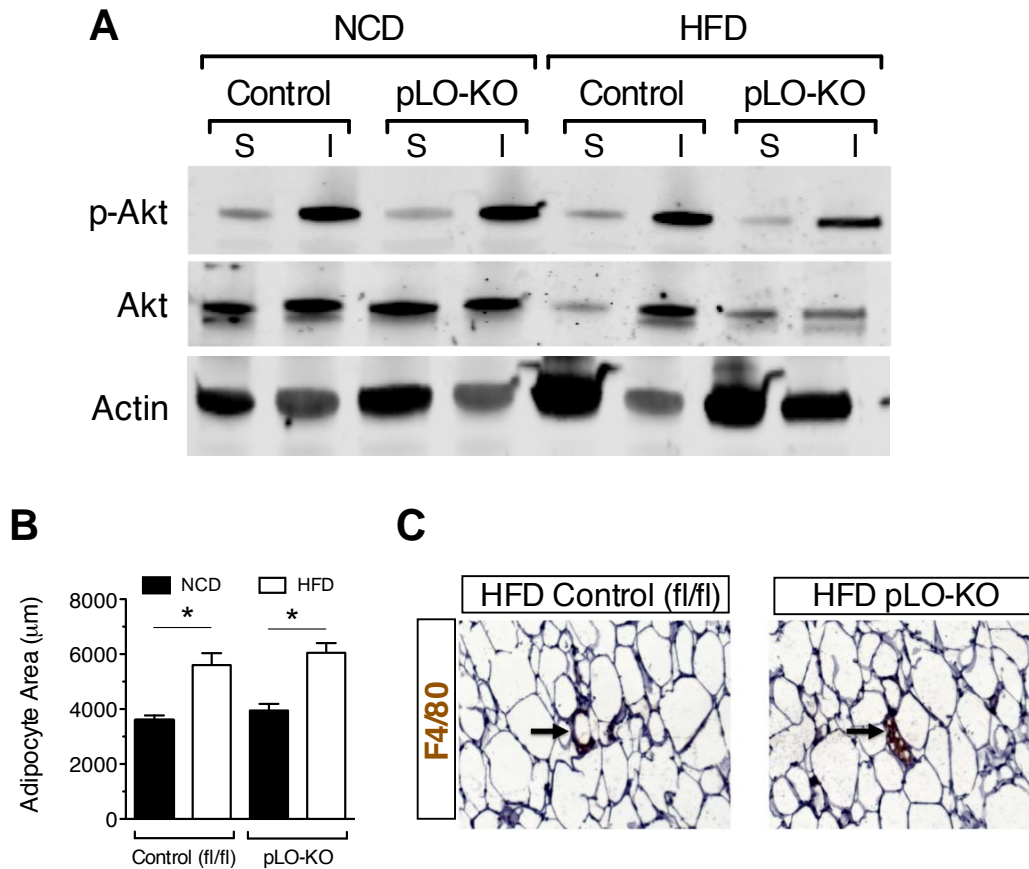

**Supplemental Figure 3: Insulin sensitivity and adipocyte size and macrophage infiltration after high fat diet feeding.** At 8 weeks of age Control (*fl/fl*), and pLO-KO male mice were placed on a normal chow diet (NCD) or a 42% kcal from fat high fat diet (HFD) for 20 weeks (N=8 animals per group). **A**, Results of immunoblots for phosphorylated Akt, total Akt, and Actin in gastrocnemius muscle from mice 5 min post insulin injection; **B**, Epididymal adipocyte size following 20 weeks feeding; **C**, Representative images of epididymal fat immunostained for F4/80+ macrophages (*brown*) and counterstained using hematoxylin (*blue*). Magnification  $\times 100$ . \* $P < 0.05$  for the comparisons indicated.
